# Supplementary material
Source: publisher figshare collection journal article supplement (https://tandf.figshare.com/ndownloader/files/20025038)
Supplement: Supplementary file 1 [file 20025038]

**Supplemental Figure 1. Flow of Participants Through the Trial.**

**332** Screened patients at high risk for PTSD (TSQ ≥ 6)

**120** Referred patients

**297** Excluded

**233** Did not meet full PTSD criteria on CAPS

**12** Did not meet full psychosis criteria on MINI-Plus

**29** Met one of the exclusion criteria

**23** Declined participation

**452** Assessed for eligibility

**155** Randomized

**53** Allocated to PE therapy

**55** Allocated to EMDR therapy

**40** Completed treatment

**44** Completed treatment

**47** Allocated to WL condition

**53** Included in analysis

**55** Included in analysis

**47** Included in analysis

**39** Completed post-treatment

**40** Completed 6-mo follow-up

**47** Completed post-treatment

**45** Completed 6-mo follow-up

**44** Completed post-treatment

**43** Completed 6-mo follow-up

Abbreviations: CAPS, Clinician-Administered PTSD Scale; EMDR, Eye Movement Desensitization and Reprocessing; 6-mo, 6 months; MINI-Plus, Mini-International Neuropsychiatric Interview-Plus; PE, Prolonged exposure; PTSD, posttraumatic stress disorder; TSQ, Trauma Screening Questionnaire; and WL, Waiting list.
